# Supplementary material for: Antimicrobial and Immunomodulatory Potential of Cow Colostrum Extracellular Vesicles (ColosEVs) in an Intestinal In Vitro Model
Source: MDPI journal article supplement (doi:10.3390/biomedicines10123264), 2022-12-15
Supplement: s1 [file s1]

**Table S3:** Results obtained from Multiplex PCR and Simplex PCR.

| Target      | Strain n° 1     | Strain n°2      |
|-------------|-----------------|-----------------|
| <i>K99</i>  | negative        | negative        |
| <i>eae</i>  | <b>positive</b> | <b>positive</b> |
| <i>Sta</i>  | negative        | negative        |
| <i>STb</i>  | negative        | negative        |
| <i>CNF1</i> | negative        | <b>positive</b> |
