# Supplementary material for: Antimicrobial and Immunomodulatory Potential of Cow Colostrum Extracellular Vesicles (ColosEVs) in an Intestinal In Vitro Model
Source: MDPI journal article supplement (doi:10.3390/biomedicines10123264), 2022-12-15
Supplement: s1 [file s1]

**Table S2:** Classes of antibiotic drugs employed for antimicrobial characterization and related clinical breakpoints.

| Antibiotic Class             | Antimicrobial agent                  | Clinical Breakpoint (µg/mL) |       |       | Source      |
|------------------------------|--------------------------------------|-----------------------------|-------|-------|-------------|
|                              |                                      | S                           | I     | R     |             |
| Amphenicols                  | Florphenicol (FFC)                   | 4                           | 8     | 16    | CLSI Vet 08 |
| Aminopenicillin              | Amoxicillin/Clavulanic Acid (AMC)    | 8/4                         | 16/8  | 32/16 | CLSI Vet 08 |
|                              | Ampicillin (AMP)                     | 0.25                        | 0.5   | 1     | CLSI Vet 08 |
| Aminoglycosides              | Gentamycin (GEN)                     | 4                           | 8     | 16    | CLSI-H M100 |
|                              | Kanamycin (KAN)                      | 16                          | 32    | 64    | CLSI-H M100 |
|                              | Aminosidine (AM)                     | 8                           | 16    | 32    | CASFM       |
| 1st-2nd gen. Cephalosporines | Cefazoline (CEZ)                     | 2                           | 4     | 8     | CLSI Vet 08 |
| Quinolones                   | Flumequine (FLQ)                     | 4                           | 8     | 16    | CASFM       |
| Fluoroquinolones             | Enrofloxacin (ENRO)                  | 0.25                        | 0.5-1 | 2     | CLSI VET 08 |
| Polymyxin                    | Colistin (COL)                       | 2                           | -     | 4     | EUCAST-11   |
| Sulphonamides                | Trimethoprim/Sulfamethoxazole (SX-T) | 2/38                        | -     | 4/76  | CLSI Vet 08 |
|                              | Sulfisoxazole (S)                    | 256                         | -     | 512   | CLSI-H M100 |
| Tetracyclines                | Tetracycline (T)                     | 4                           | 8     | 16    | CLSI VET 08 |
