# Supplementary material for: Antimicrobial and Immunomodulatory Potential of Cow Colostrum Extracellular Vesicles (ColosEVs) in an Intestinal In Vitro Model
Source: MDPI journal article supplement (doi:10.3390/biomedicines10123264), 2022-12-15
Supplement: s1 [file s1]

**Table S4:** MIC values (µg/mL) and related SIR results of antimicrobial agents tested against *E. coli* strains.

| Antimicrobial agent                  | Strain n° 1        |             | Strain n°2        |             |
|--------------------------------------|--------------------|-------------|-------------------|-------------|
|                                      | MIC values (µg/mL) | SIR results | MIC values(µg/mL) | SIR results |
| Ampicillin (AMP)                     | 32                 | I           | 32                | R           |
| Amoxicillin/ Clavulanic Acid (AMC)   | 8                  | S           | 8                 | S           |
| Aminosidine (AM)                     | 32                 | R           | 4                 | S           |
| Flumequine (FLQ)                     | 4                  | S           | 128               | S           |
| Cefazoline (CEZ)                     | 8                  | R           | 2                 | S           |
| Colistin (COL)                       | 0.5                | S           | 0.5               | S           |
| Enrofloxacin (ENRO)                  | 0,25               | S           | 0.03              | S           |
| Florphenicol (FFC)                   | 8                  | I           | 4                 | S           |
| Gentamycin (GEN)                     | 2                  | S           | 0,5               | S           |
| Kanamycin (KAN)                      | 32                 | R           | 4                 | S           |
| Sulfisoxazole (S)                    | 128                | S           | 256               | R           |
| Trimethoprim/Sulfamethoxazole (SX-T) | 0.06               | S           | 0.12              | S           |
| Tetracycline (T)                     | 2                  | S           | 2                 | S           |

*S: sensitive; I: intermediate; R: resistant*
