# Supplementary material for: Antimicrobial and Immunomodulatory Potential of Cow Colostrum Extracellular Vesicles (ColosEVs) in an Intestinal In Vitro Model
Source: MDPI journal article supplement (doi:10.3390/biomedicines10123264), 2022-12-15
Supplement: s1 [file s1]

**Table S1.** Primers, amplicon sizes and thermal profiles used for Multiplex and Simplex PCR

| Primers          | Sequences                                                                | Amplicon Size | Cycles | Thermal profiles                                                                                                                |
|------------------|--------------------------------------------------------------------------|---------------|--------|---------------------------------------------------------------------------------------------------------------------------------|
| <i>eae</i>       | For – 5'–CATTGATCAGGATTTTCTGGTGATA-3'<br>Rev-5'-CTCATGCGGAAATAGCCGTTA-3' | 101           | 45     | 10 minutes at 45 °C, 10 minutes at 95 °C then 45 cycle, 15s of denaturation and 60s of extension. Acquisition of fluorescence   |
| <i>eae</i> Probe | p-ATAGTCTCGCCAGTATTCGCCACCAATACC                                         |               |        |                                                                                                                                 |
| <i>STb</i>       | For – 5'–TGCCTATGCATCTACACAAT-3'<br>Rev-5'-CTCCAGCAGTACCATCTCTA-3'       | 113           |        |                                                                                                                                 |
| <i>STa</i>       | For – 5'–CAACTGAATCACTTGACTCTT-3'<br>Rev-5'-TTAATAACATCCAGCACAGG-3'      | 158           | 30     | 60s of denaturation at 90°C, 60s of annealing at 55°C, 60s of extension at 70 °C and the final extension of 10 minutes at 70 °C |
| <i>K99</i>       | For – 5'–AATACTTGTTCTGGGAGAAA-3'<br>Rev-5'-AACTTTGTGGTAACTTCCT-3'        | 230           |        |                                                                                                                                 |
| <i>CNF1</i>      | For – 5'–AGGAAGTTATATTTCCGTAGG-3'<br>Rev-5'-GTATTTGCCTGAACCGTAA-3'       | 552           | 35     | 60s of denaturation at 94°C, 60s of annealing at 63°C, 60s of extension at 72 °C and the final extension of 10 minutes at 72 °C |
