# Supplementary material for: Antimicrobial and Immunomodulatory Potential of Cow Colostrum Extracellular Vesicles (ColosEVs) in an Intestinal In Vitro Model
Source: MDPI journal article supplement (doi:10.3390/biomedicines10123264), 2022-12-15
Supplement: s1 [file s1]

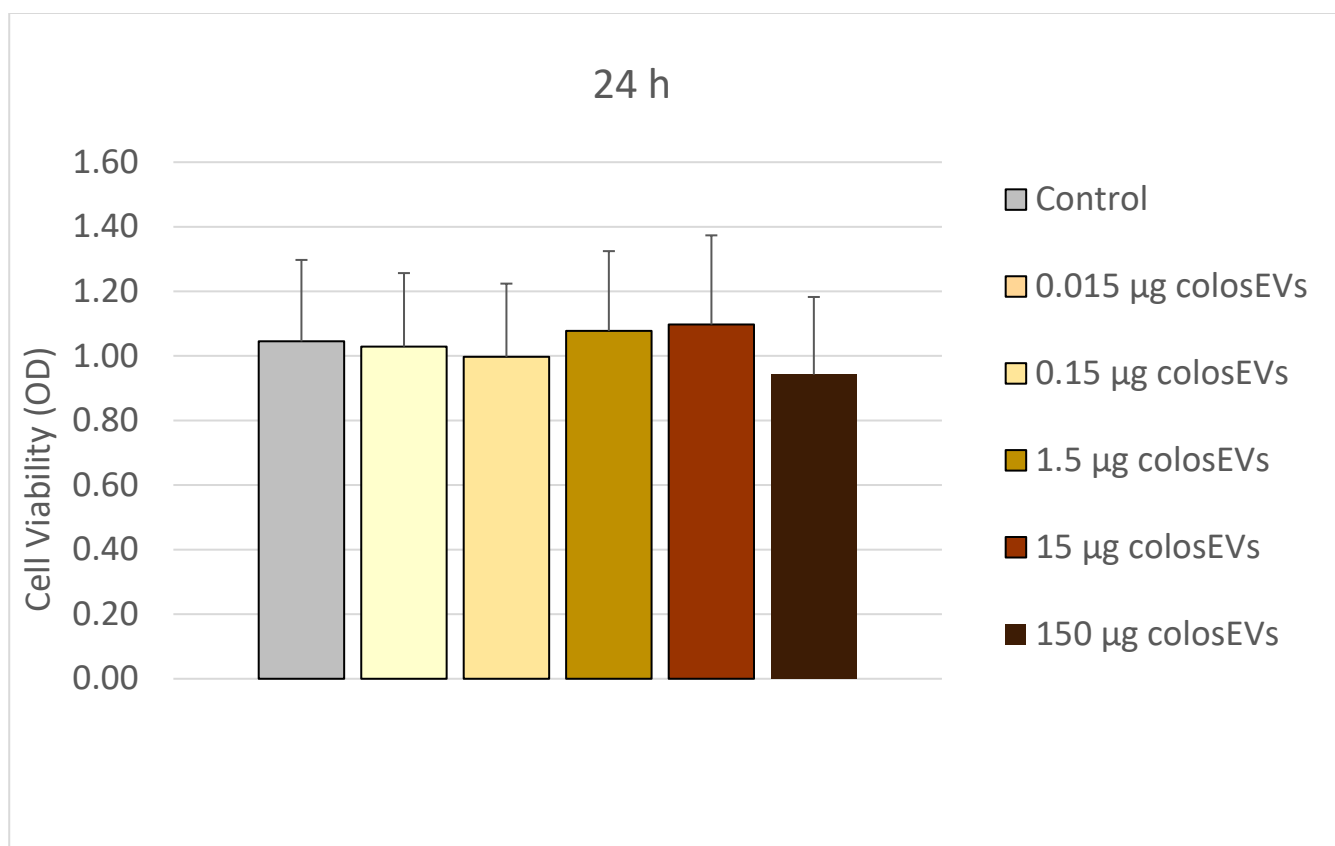

**Figure S1.** Viability of IPEC-J2 after 24 h colosEVs exposure. The different concentrations of colosEVs did not determine a significant difference in terms of cell viability after 24 h. Data are expressed as optical density (OD)  $\pm$  SD. Differences were evaluated through the Kruskal-Wallis test and applying the post-doc Dunn's Multiple Comparison Test.
